# Supplementary material
Source: PubMed Central journal article supplement (PMC4577997)

## SUPPLEMENTARY DATA

Fig. S1. Loading control of the western blot in Fig. 1F in the main text, using Ponceau staining of the membrane.

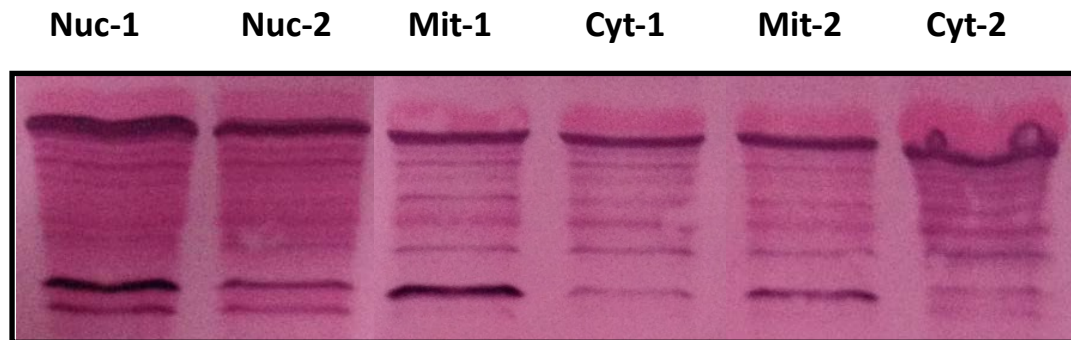

Supplement: supp_mcv076_aob-15057-s01.pdf [file supp_mcv076_aob-15057-s01.pdf]
